# Supplementary material
Source: PubMed Central journal article supplement (PMC3769886)
Supplement: neo1509_1075SD1.pdf [file neo1509_1075SD1.pdf]

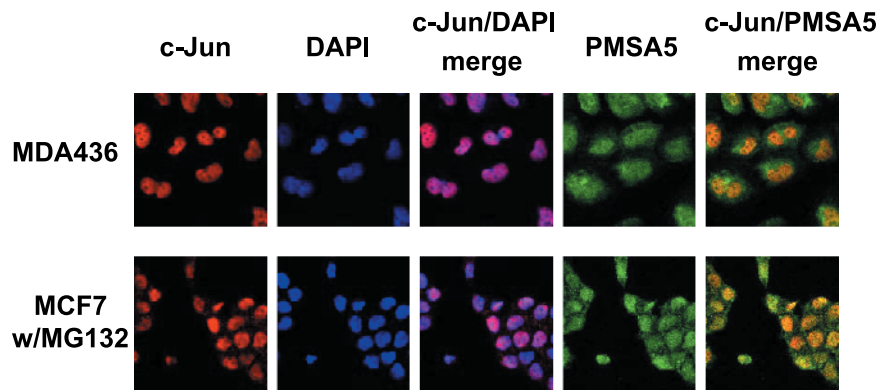

**Figure W1.** Colocalization of c-Jun and PMSA5. Immunofluorescence staining of c-Jun and PMSA5 in MDA-MB-436 and 10  $\mu$ M MG132-treated MCF7 cells. DAPI was used to stain nucleus.

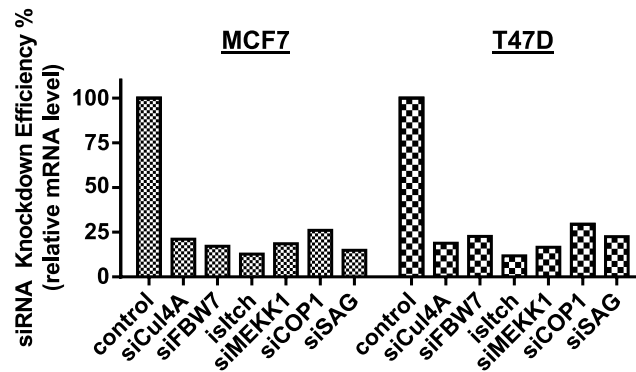

**Figure W2.** siRNA-mediated knockdown effect of c-Jun-targeting E3 ligases. MCF7 and T47D cells were transfected with 50 nM control or siRNA pool against CUL4, FBW7, ITCH, MEKK1, COP1, or SAG for 3 days. Total RNA was extracted from these cells and subjected to quantitative reverse transcription-polymerase chain reaction with the respective primers.  $\beta$ -Actin mRNA was used as the internal control for standardization.

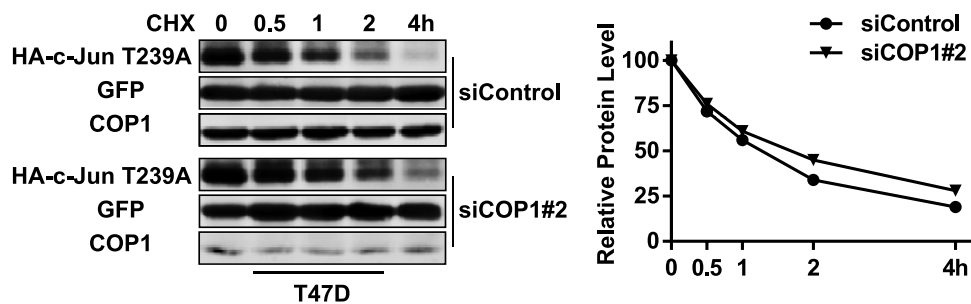

**Figure W3.** Depletion of COP1 does not alter protein stability of c-Jun-T239A. T47D cells were treated with control or COP1 siRNA for 2 days. HA-tagged c-Jun-T239A was then co-transfected into these cells with GFP for 1 day followed by the addition of 20  $\mu$ g/ml cycloheximide for varying times. Cells were harvested, and cell lysates were analyzed by immunoblot analysis to detect HA-tagged c-Jun and GFP. The relative HA-tagged c-Jun amount was standardized by the amount of GFP.

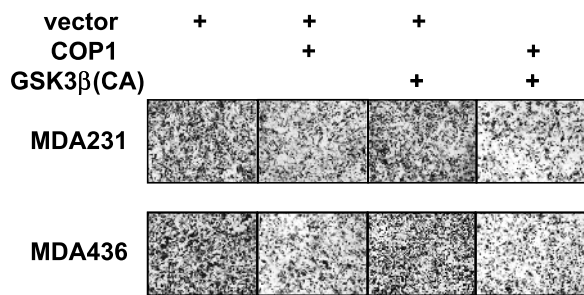

**Figure W4.** Simultaneously expressing COP1 and constitutively active GSK3β block cell migration of invasive breast cancer cells. COP1 and GSK3β(CA) were lentivirally transduced into MDA-MB-231 and MDA-MB-436 cells either alone or together. Populations of transduced cells were added into transwells and allowed to migrate for 4 hours. Images are crystal violet–stained migratory cells on the undersurface of transwells.

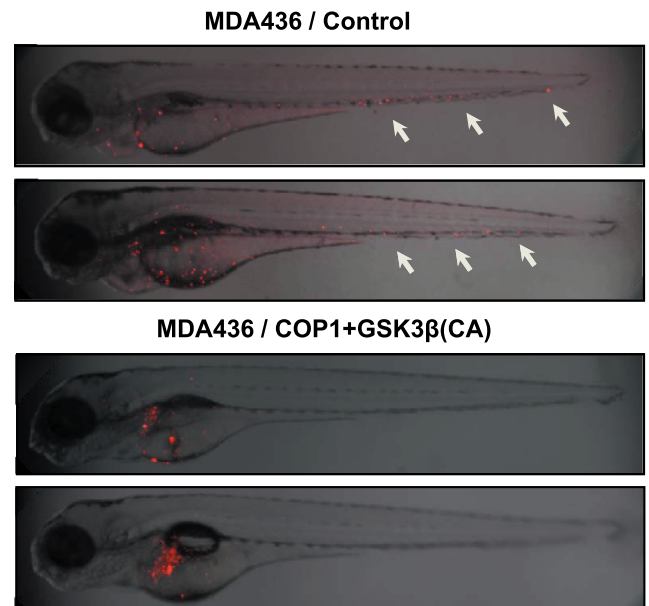

**Figure W5.** Simultaneously expressing COP1 and constitutively active GSK3β suppress breast cancer cell metastasis. MDA-MB-436 cells were lentivirally transduced with COP1 and constitutively active GSK3β together for 3 days. Control and COP1/GSK3βS9A-transduced MDA-MB-436 cells were then labeled with fluorescent dye CM-Dil and microinjected into the perivitelline space of 48-hpf zebrafish embryos. Embryos were imaged under a confocal microscope.

**Table W1.** Clinicopathologic Correlates of COP1 Expression in Human Breast Cancer.

| Clinical Features | COP1 Expression* |          | P Value <sup>†</sup> |
|-------------------|------------------|----------|----------------------|
|                   | Low (%)          | High (%) |                      |
| Histologic grade  |                  |          |                      |
| 1                 | 5                | 6        | .28                  |
| 2-3               | 26               | 77       |                      |
| Tumor diameter    |                  |          | .72                  |
| <2 cm             | 6                | 22       |                      |
| ≥2 cm             | 26               | 70       |                      |
| Lymph node status |                  |          | .71                  |
| Negative          | 14               | 48       |                      |
| Positive          | 15               | 40       |                      |
| ER receptor       |                  |          | .46                  |
| Negative          | 13               | 44       |                      |
| Positive          | 20               | 46       |                      |
| PR receptor       |                  |          | .89                  |
| Negative          | 15               | 42       |                      |
| Positive          | 12               | 35       |                      |

PR indicates progesterone receptor.

\*Low/high by median (low, COP1 < 0; high, COP1 ≥ 0 expression value).

<sup>†</sup>Pearson  $\chi^2$  test.
